# Supplementary material for: Self-assembled monolayer boosts the air-stability and electrochemical reversibility of O3-type layered oxides for sodium-ion batteries
Source: Royal Society of Chemistry journal article supplement (doi:10.1039/d5ta00173k), 2025-01-01
Supplement: d5ta00173k1.pdf [file d5ta00173k1.pdf]

1

## Supporting Information

2 **Self-Assembled Monolayer Boosts the Air-Stability and**  
3 **Electrochemical Reversibility of O3-Type Layered Oxides for Sodium-**  
4 **Ion Batteries**

5 Yan He,<sup>a</sup> Lei Zhang,<sup>a</sup> Hongguang Liu,<sup>a</sup> Zichao Yan,<sup>\*,a,b</sup> and Zhiqiang Zhu<sup>\*,a,b</sup>

6 <sup>a</sup>. State Key Laboratory of Chemo/Biosensing and Chemometrics, College of Chemistry and  
7 Chemical Engineering, Hunan University, Changsha 410082, China.

8 E-mail: zcyan@hnu.edu.cn; zqzhu@hnu.edu.cn

9 <sup>b</sup>. Greater Bay Area Institute for Innovation, Hunan University, Guangzhou 511300, China.

10

## 11 Experimental Section

### 12 1. Preparation of NFM and NFM@DHP

13 O<sub>3</sub>-NaNi<sub>0.33</sub>Fe<sub>0.33</sub>Mn<sub>0.33</sub>O<sub>2</sub> (NFM) powders were synthesized by a traditional sol-  
14 gel route.<sup>1, 2</sup> The stoichiometric amounts of CH<sub>3</sub>COONa (5% excess),  
15 Mn(CH<sub>3</sub>COO)<sub>2</sub>·4H<sub>2</sub>O, Ni(CH<sub>3</sub>COO)<sub>2</sub>·4H<sub>2</sub>O, and Fe(NO<sub>3</sub>)<sub>3</sub>·9H<sub>2</sub>O were fully dissolved  
16 in deionized water and then mixed with aqueous citric acid under vigorously stirred till  
17 a clear solution was obtained. The resulting solution was heated and stirred in a 90 °C  
18 oil bath, with excess aqueous solution evaporated off until a clear and viscous gel  
19 formed. The as-formed gel was dried at 125 °C overnight to produce a loose and porous  
20 precursor. Then, the precursor was ground, calcined in air at 500 °C for 6 h, reground,  
21 pressed into pellets, and calcined again at 900 °C for 10 h. Finally, the pellets were  
22 ground to obtain the final NFM powders.

23 The NFM@DHP composite was prepared using a straightforward infiltration  
24 approach. An appropriate amount of dicetyl phosphate (C<sub>32</sub>H<sub>67</sub>O<sub>4</sub>P) was fully dissolved  
25 in 20 mL of tetrahydrofuran (THF) to form a 0.01 wt% solution. Then, 0.2 g of NFM  
26 powders were immersed in the above solution. After vigorous stirring for 2 h at room  
27 temperature, the dispersion was centrifuged, followed by thorough washing with THF  
28 to remove residual DHP molecules. The precipitates were then vacuum-dried overnight  
29 at 60 °C to give the target NFM@DHP composite.

30 To assess the air stability of NFM and NFM@DHP, the samples were exposed to  
31 an environment with a relative humidity (RH) of 45-50% for various durations. This  
32 was achieved by placing the materials on a watch glass in a sealed container with a  
33 saturated solution of K<sub>2</sub>CO<sub>3</sub>. The container was placed in a controlled environment at  
34 30°C, with the RH regulated at 45-50% using a hygrometer. According to the  
35 experimental requirements, the materials were placed for certain days to obtain the  
36 target materials.

### 37 2. Characterizations.

38 The crystalline structures of the samples were identified using X-ray diffraction  
39 (XRD, Bruker D8 ADVANCE) with Cu K $\alpha$  radiation. The GSAS-II software was used  
40 to obtain the Rietveld refinement data. The morphologies of the samples were observed  
41 by scanning electron microscopy (SEM, TESCAN MIRA3) equipped with energy-  
42 dispersive X-ray spectroscopy (EDS). Transmission electron microscopy (TEM, Talos  
43 f200i) was manipulated to acquire images of the refined structures of the samples.

44 Fourier transform infrared spectroscopy (FT-IR, BRUKER TENSOR II (FTS6000))  
45 was recorded using KBr pellets in a unit of  $\text{cm}^{-1}$ . The chemical compositions were  
46 detected on an X-ray photoelectron spectrometer (XPS, Thermo Fischer, ESCALAB  
47 Xi+) under a vacuum of  $8 \times 10^{-10}$  Pa (the C 1s peak at 284.8 eV as reference). Contact  
48 angle analysis was recorded on a SINDIN SDC-200S instrument at room temperature.

### 49 ***3. Electrochemical measurements.***

50 The electrochemical performance of the samples was evaluated using CR2032  
51 coin-type cells assembled in an argon-filled glove box. The cathodes were prepared by  
52 mixing the active materials with super-P carbon black and polyvinylidene fluoride  
53 (PVDF) binder with a mass ratio of 8:1:1 in N-methyl pyrrolidone (NMP) to obtain a  
54 stable homogeneous suspension, which was then coated on aluminum foil. The mass  
55 loading of the active material on the electrode was 1-1.5  $\text{mg cm}^{-1}$ . Prior to slurry  
56 preparation, all exposed samples were dried under vacuum conditions at 80 °C. Sodium  
57 metal foil was used as then anode and glass fiber (GF/D, Whatman,  $\Phi$ 19 mm) was used  
58 as the separator. The electrolyte was 1 M  $\text{NaClO}_4$  in a mixture of propylene  
59 carbonate/ethylene carbonate (PC/EC = 1:1 in volume) with fluoroethylene carbonate  
60 (5% volume), with about 100  $\mu\text{L}$  of electrolyte added into each coin-type cell using a  
61 pipette. All batteries were rested overnight before testing. The cells were initially  
62 activated for 3 cycles at 0.1 C before undergoing long-cycle testing. The cycled  
63 cathodes (NFM and NFM@DHP) for XRD measurement were rinsed three times with  
64 propene carbonate and subsequently blow-dried under argon gas. Electrochemical  
65 impedance spectra (EIS) were acquired by an Admiral Instruments electrochemical  
66 workstation. Charge and discharge measurements were carried out using multichannel  
67 battery testing systems (CT2001A Wuhan LAND Electronics Co., Ltd., China) at room  
68 temperature.

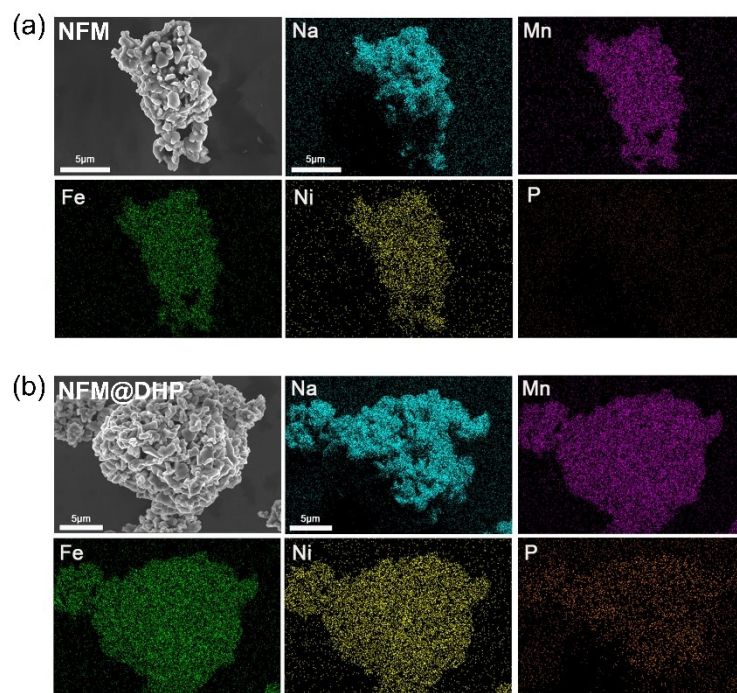

69

70 **Figure S1** EDS mappings for Na, Mn, Fe, Ni, and P elements of a) NFM and b) NFM@DHP.

71

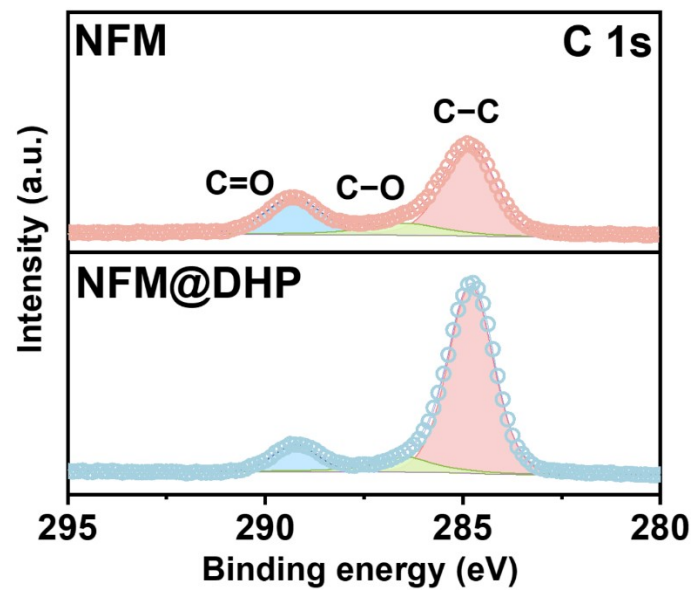

Figure S2 C 1s XPS spectra of NFM and NFM@DHP.

72  
73  
74

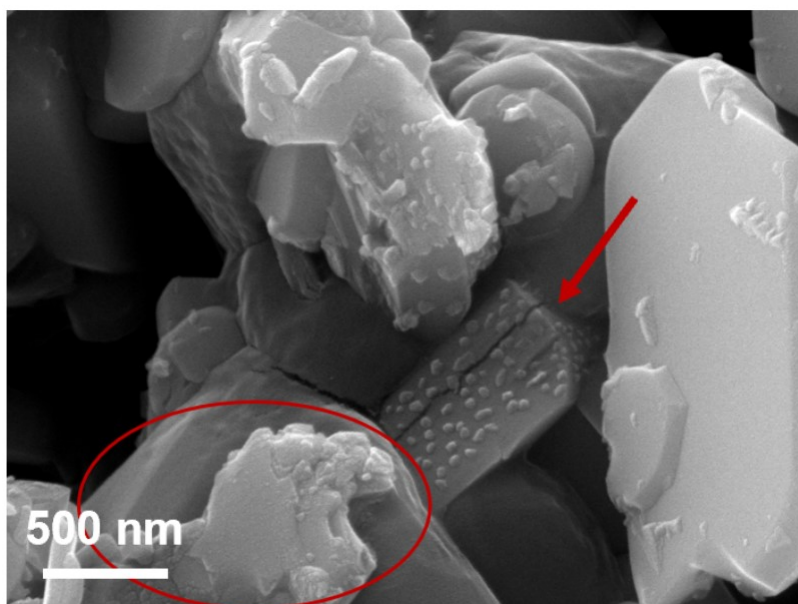

75  
76  
77

**Figure S3** SEM image of NFM-7D.

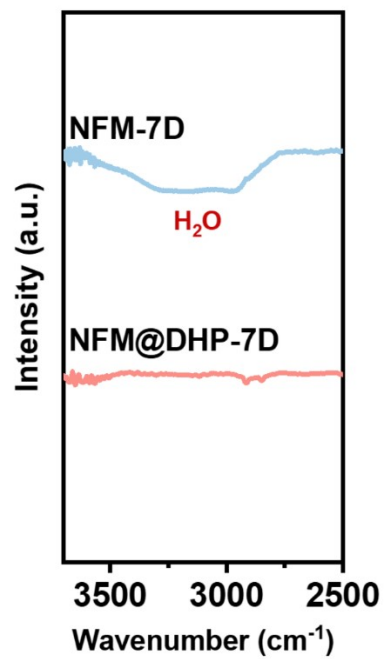

78  
79  
80

**Figure S4** FTIR spectra of NFM-7D and NFM@DHP-7D.

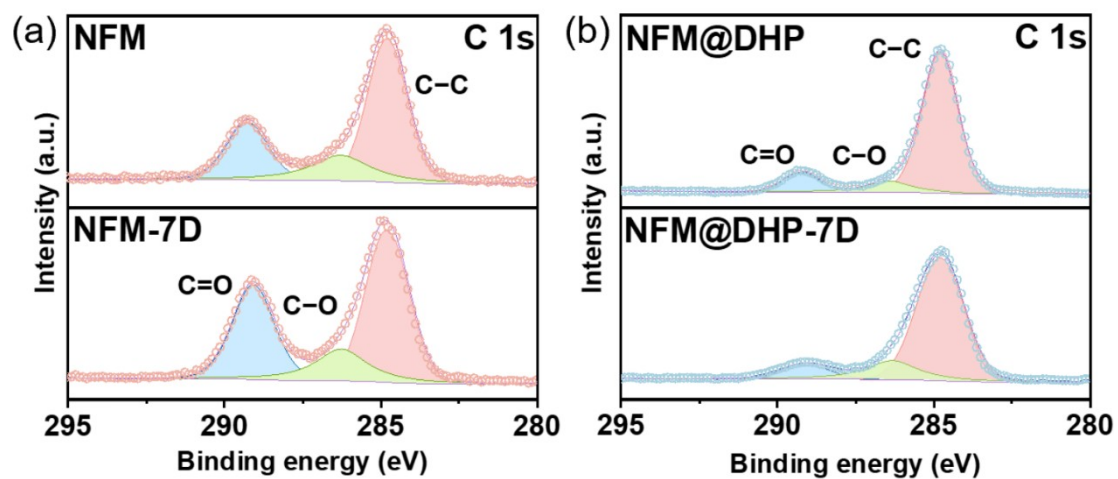

81

82 **Figure S5** C 1 s XPS spectra of a) NFM and NFM-7D, and b) NFM@DHP and NFM@DHP-7D.

83



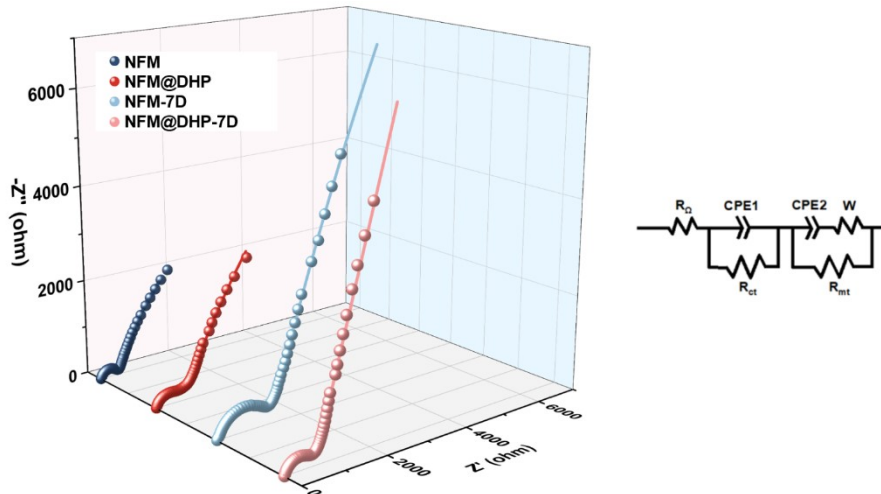

84

85 **Figure S6** Nyquist plots of NFM and NFM@DHP before and after being exposed for 7 days. The  
 86 increased interfacial resistance of NFM@DHP should be ascribed to the presence of the DHP  
 87 coating on the electrode surface.

88

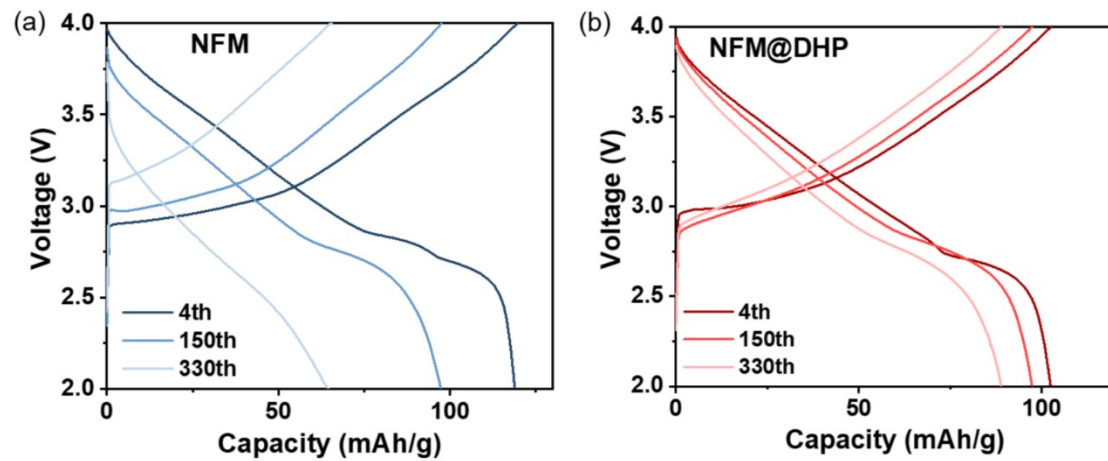

89

90

91 **Figure S7** Charge/discharge curves of a) NFM and b) NFM@DHP at the 4th, 150th, and 330th

92 cycles.

93

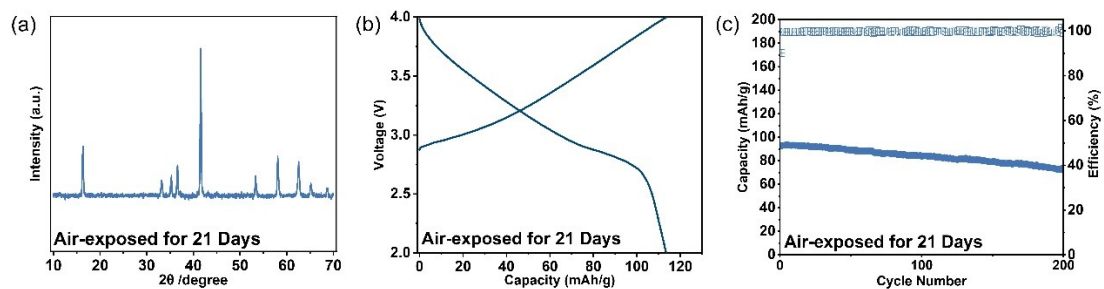

94

95 **Figure S8** a) XRD spectrum, b) the first charge/discharge curve at 0.1C, and c) cycling stability at  
96 1C of NFM@DHP after 21-days of air exposure.

97

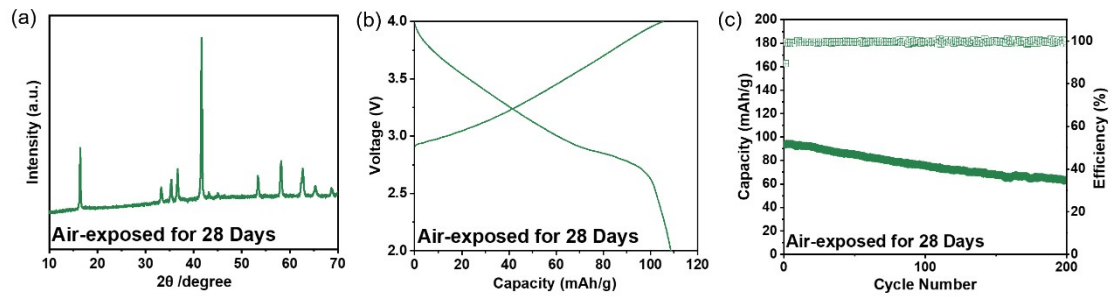

98

99 **Figure S9** a) XRD spectrum, b) the first charge/discharge curve at 0.1C, and c) cycling stability at  
100 1C of NFM@DHP after 28-days of air exposure.

101

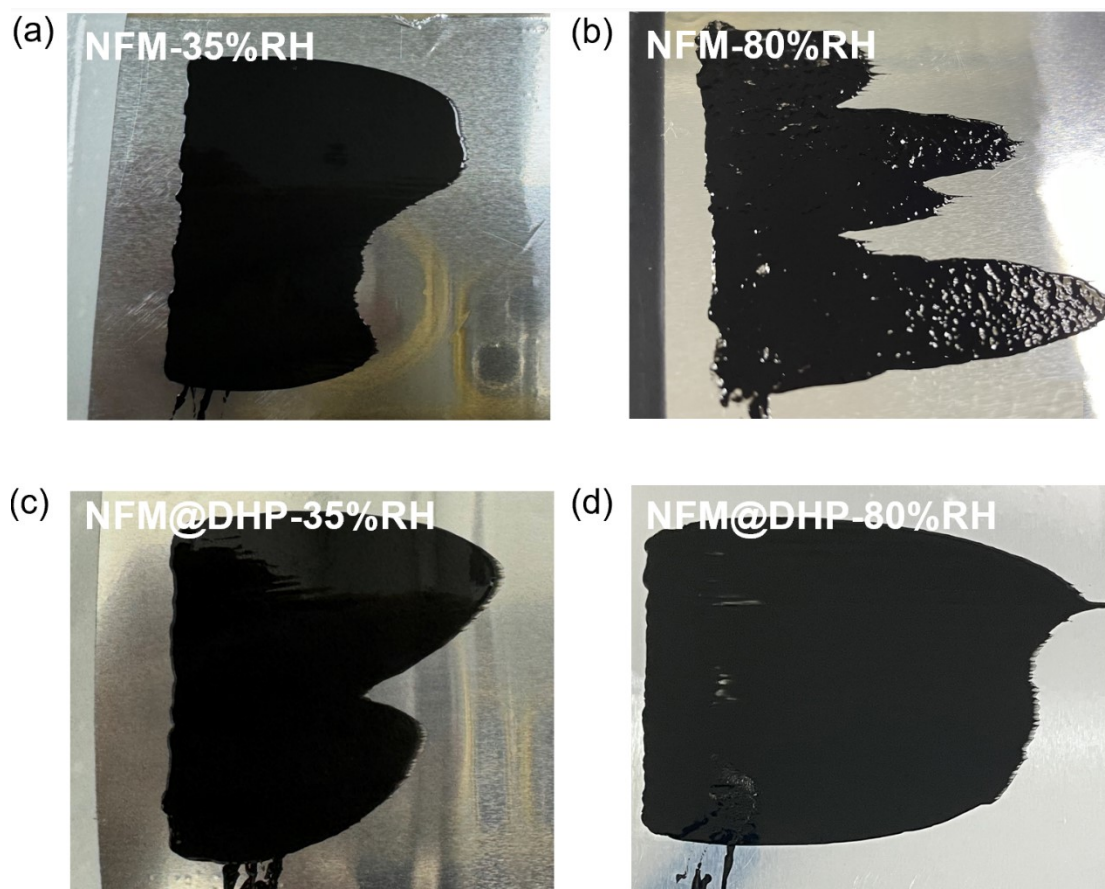

102

103 **Figure S10** Photographs of the slurries of a, b) NFM and c, d) NFM@DHP under a, c) humid and  
104 b,d) dry air.

105

106

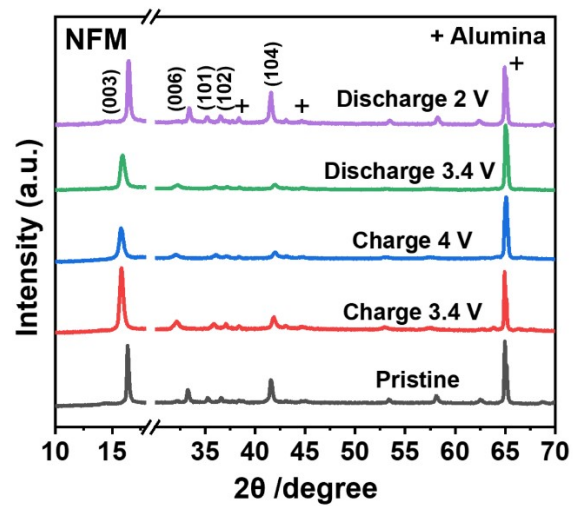

107

108

**Figure S11** Ex-situ XRD of the NFM electrode during the initial cycle at 0.1 C.

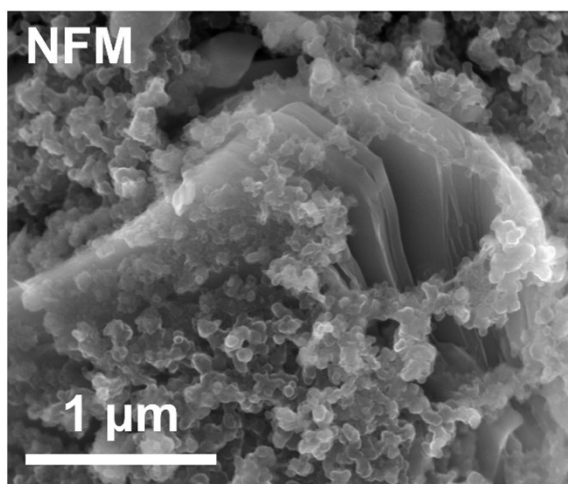

110  
111  
112  
113

**Figure S12** SEM image of NFM after 200 cycles at 1C.

- 114 [1] B.S. Kumar, A. Pradeep, V. Srihari, H.K. Poswal, R. Kumar, A. Amardeep, A.  
115 Chatterjee, A. Mukhopadhyay, Cation–oxygen bond covalency: a common thread  
116 and a major influence toward air/water-stability and electrochemical behavior of  
117 “layered” Na–transition-metal-oxide-based cathode materials, *Adv. Energy*  
118 *Mater.* 13 (2023) 2204407. <https://doi.org/10.1002/aenm.202204407>.
- 119 [2] C. Zhou, L. Yang, C. Zhou, B. Lu, J. Liu, L. Ouyang, R. Hu, J. Liu, M. Zhu, Co-  
120 substitution enhances the rate capability and stabilizes the cyclic performance of  
121 O3-type cathode  $\text{NaNi}_{0.45-x}\text{Mn}_{0.25}\text{Ti}_{0.3}\text{Co}_x\text{O}_2$  for sodium-ion storage at high  
122 voltage, *ACS Appl. Mater. Interfaces.* 11 (2019) 7906–7913.  
123 <https://doi.org/10.1021/acsami.8b17945>.  
124
